# Supplementary material
Source: PubMed Central journal article supplement (PMC10201604)
Supplement: NIHMS1650162-supplement-1.pdf [file NIHMS1650162-supplement-1.pdf]

Supplementary Table 1:

| qPCR primers |                       |                         |
|--------------|-----------------------|-------------------------|
| Name         | Forward Sequence      | Reverse Sequence        |
| CCL1         | CCCAAGAACATCCAAAGTGTG | CATTCTTGAGTGTGGCTATGA   |
| CCL2         | CTCAAGAACATCCAAAGTGTG | ATTCTTGAGTGTGGCTATGAC   |
| CCL3         | CGGTGTCATCTTCCTAACC   | TCGCTGACATATTTCTGGAC    |
| CCL4         | AGCTGTGGTATTCCAAACC   | TCATACACGTACTIONCCTGGAC |
| CCL5         | TATTCCTCGGACACCACAC   | GTGACAAAGACGACTGCTG     |
| CCL8         | AAGCTGTGATCTTCAAGACC  | AGCTTCATGGAATCCCTGAC    |
| CXCL9        | GATTGGAGTGCAAGGAACC   | GATTGTAGGTGGATAGTCCCT   |
| CXCL10       | ACGTGTTGAGATCATTGCT   | AAATTCTTGATGGCCTTCGA    |
| GAPDH        | ACCACAGTCCATGCCATCAC  | TCCACCACCCTGTTGCTCTA    |
| IL-6         | GATTCAATGAGGAGACTTGCC | TGTTCTGGAGGTACTCTAGGT   |
| IL-8         | ACTCCAAACCTTTCCACCC   | CAATAATTTCTGTGTTGGCGC   |
| TNF          | CTCTAATCAGCCCTCTGGC   | GAGGGTTTGCTACAACATGG    |

Supplementary Table 2:

| Name     | Forward Sequence     |
|----------|----------------------|
| Control  | GTATTACTGATATTGGTGGG |
| STAMPB.1 | CCAGAGCGGAAGTACCGACG |
| STAMPB.2 | AATCGATGGATTGCGCCATG |
